# Supplementary material
Source: PubMed Central journal article supplement (PMC5405209)
Supplement: JB.00817-16_zjb999094393s1.pdf [file JB.00817-16_zjb999094393s1.pdf]

## SUPPLEMENTAL INFORMATION

### Reoxidation of the Thiol-Disulfide Oxidoreductase MdbA by a Bacterial Vitamin K Epoxide Reductase in the Biofilm-forming Actinobacterium *Actinomyces oris*

Truc Thanh Luong,<sup>1</sup> Melissa E. Reardon-Robinson,<sup>1,2</sup> Sara D. Siegel,<sup>1</sup> and Hung Ton-That<sup>1†</sup>

<sup>1</sup>*Department of Microbiology & Molecular Genetics, University of Texas Health Science Center, Houston, TX, USA*

<sup>2</sup>*Department of Microbiology & Immunobiology, Harvard Medical School, Boston, MA, USA*

\*Running title: *VKOR-catalyzed reoxidation of MdbA*

†To whom correspondence should be addressed:  
Hung Ton-That, Department of Microbiology and Molecular Genetics  
University of Texas Health Science Center  
6431 Fannin Street, R224/MSE  
Houston, TX 77030, USA.  
Tel. (+1) 713 500 5468; Fax (+1) 713 500 5499;  
E-mail: [ton-that.hung@uth.tmc.edu](mailto:ton-that.hung@uth.tmc.edu)

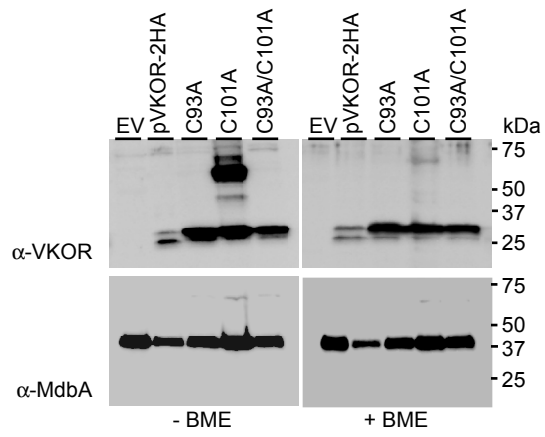

**Figure S1:** C93 is involved in the formation of MdbA-VKOR complex. Membrane fractions of *A. oris* strains pVKOR, C93A, C101A and C93A/C101A were prepared in the absence or presence of 10%  $\beta$ -mercaptoethanol (BME). The protein samples were analyzed by SDS-PAGE and immunoblotted with  $\alpha$ -VKOR and  $\alpha$ -MdbA.

**Table S1. Primers used in this study**

| Primer               | Sequence                                  | Application                    |
|----------------------|-------------------------------------------|--------------------------------|
| VKOR-HindIII-F       | AAAAGCTTACGCCTCGGTAACGGTGG                | pVKOR<br>p <i>Mtb</i> VKOR     |
| VKOR-HA-dn           | GTCATAAGGATATTCCCCGAAGAGCCTGG<br>CCAG     | pVKOR                          |
| HA-up                | GAATATCCTTATGACGTCCCAGAC                  | pVKOR<br>p <i>Mtb</i> VKOR     |
| HA-NdeI-R            | AACATATGTCAAGCATAATCAGGTACATC             | pVKOR<br>p <i>Mtb</i> VKOR     |
| VKOR-C65A-F          | GCCGCACTGATCGGGATCCTC                     | pVKOR-C65A                     |
| VKOR-C65A-R          | CACGGTGAGCAACCAGCCGAA                     | pVKOR-C65A                     |
| VKOR-C73A-F          | GCCTGGGAGCTCATTACCGCC                     | pVKOR-C73A                     |
| VKOR-C73A-R          | GGCGAGGATCCCGATCAGTGC                     | pVKOR-C73A                     |
| VKOR-C93A-F          | GCCGACGTTAGCCCCCTG                        | pVKOR-C93A                     |
| VKOR-C93A-R          | AACGAGCTCTGCATCCGGGTT                     | pVKOR-C93A                     |
| VKOR-C101A-F         | TGTCCGCAGGGGACTCCCTCAA                    | pVKOR-C101A<br>pVKOR-C93AC101A |
| VKOR-C101A-R         | CCAGGGGGCTAACGTC                          | pVKOR-C101A                    |
| VKOR-C175A-F         | GCTCCCTTCTGCATGGTCATC                     | pVKOR-C175A                    |
| VKOR-C175A-R         | GAGCTTGCCGAAGGTCATGATGGA                  | pVKOR-C175A                    |
| VKOR-C178A-F         | GCCATGGTCATCTGGTCCGTC                     | pVKOR-C178A                    |
| VKOR-C178A-R         | GAAGGGACAGAGCTTGCCGAA                     | pVKOR-C178A                    |
| VKOR-<br>C93AC101A-R | CCAGGGGGCTAACGTCGGCAAC                    | pVKOR-C93AC101A                |
| LIC-VKOR-F           | TACTTCCAATCCAATGCAATGTCGCGCATG<br>CCC     | pMCSG7-VKOR <sub>1-56</sub>    |
| LIC-VKOR-R           | TTATCCACTTCCAATGTTATCACCGCTCGG<br>CCCCGGA | pMCSG7-VKOR <sub>1-56</sub>    |

|              |                                     |                   |
|--------------|-------------------------------------|-------------------|
| VKOR-Mtb-R   | GGCAGGTCGAGCTGCCATCGTCAGTCTCC<br>TC | p <i>Mtb</i> VKOR |
| VKOR-Mtb-F   | GAGGAGACTGACGATGGCAGCTCGACCT<br>GCC | p <i>Mtb</i> VKOR |
| Mtb-HA-R     | GTCATAAGGATATTCGATCAGCGTCGACC<br>A  | p <i>Mtb</i> VKOR |
| pVKORseq     | TCCTGATAAGCCCACGAC                  | sequencing        |
| pMCSG7seq    | AATTGTGAGCGGATAACA A                | sequencing        |
| RT-16s-F     | GTCGCTAGTAATCGCAGATCAG              | qPCR              |
| RT-16s-R     | GGTGTTGCCGACTTTCATG                 | qPCR              |
| RT-AoVKOR-F  | ATTCCGGCGAGGACTTAGC                 | qPCR              |
| RT-AoVKOR-R  | TCGCAAACGAGCTCTGCATC                | qPCR              |
| RT-MtbVKOR-F | CTGATCGGCGGTGTGATCG                 | qPCR              |
| RT-MtbVKOR-R | GGGTTGACATTGCATGACGG                | qPCR              |

---
